# Supplementary material for: SARS-CoV-2 seroprevalence in pregnant women during the first three COVID-19 waves in The Gambia
Source: bioRxiv or medRxiv preprint supplement (doi:10.1101/2023.06.09.23291201), 2023-06-12

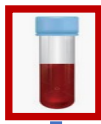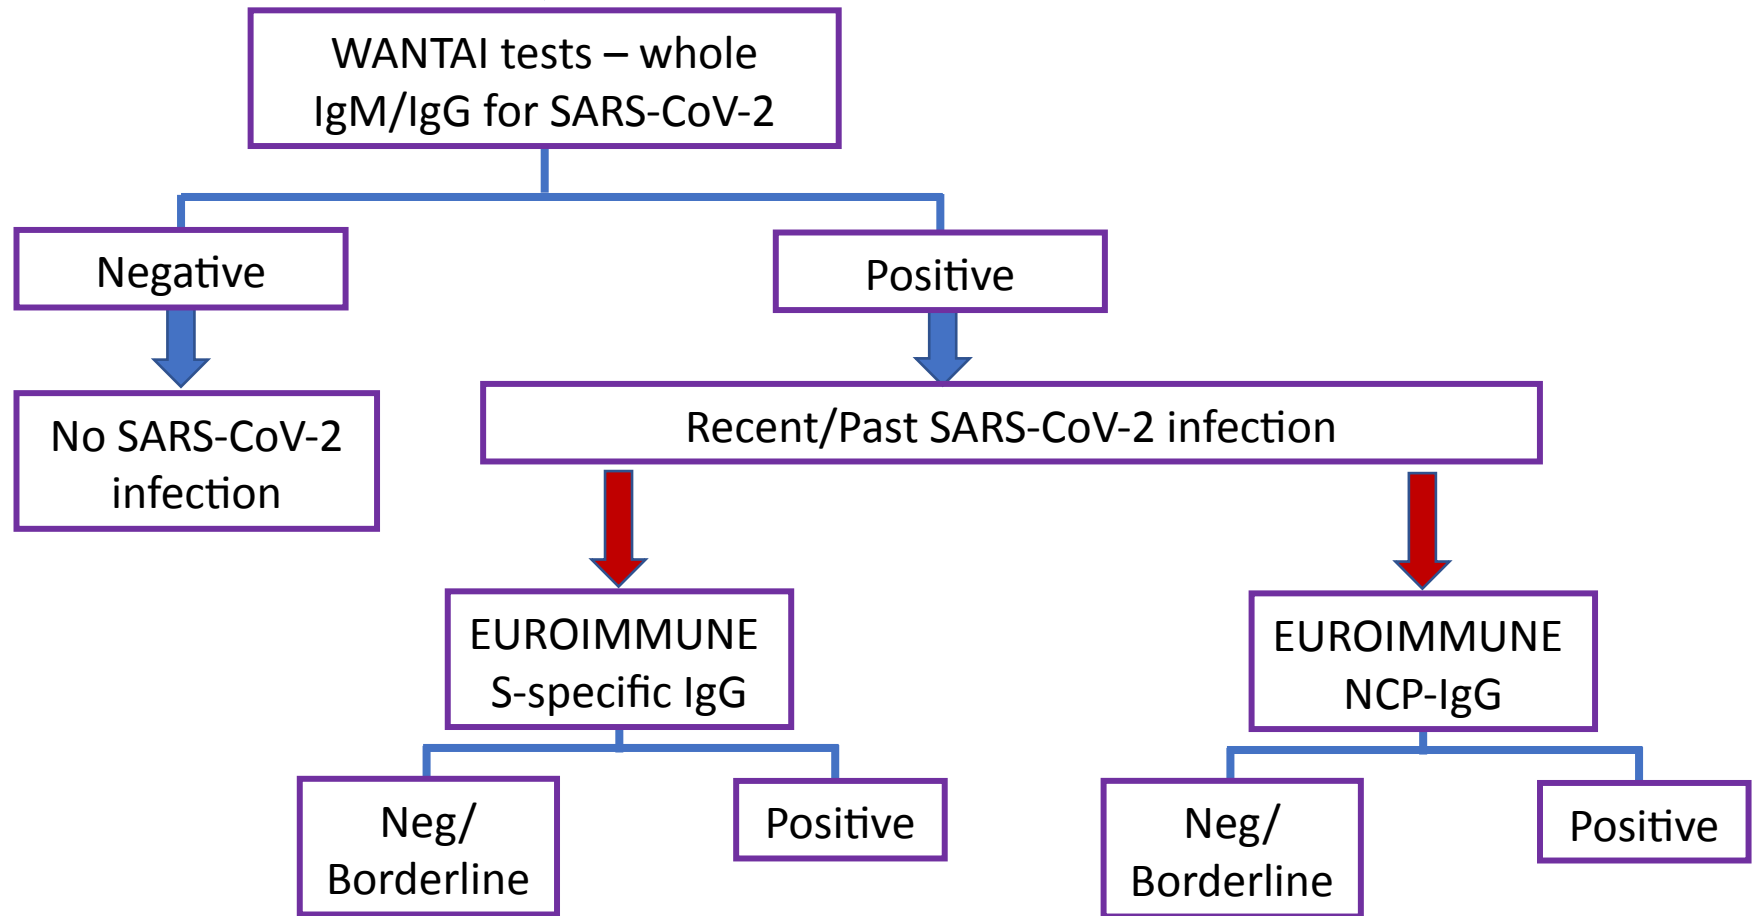

Supplement: Supplementary file [file media-3.pdf]
